# Supplementary material for: Prospective Observational Study to Evaluate the Effect of Different Levels of Positive End-Expiratory Pressure on Lung Mechanics in Patients with and without Acute Respiratory Distress Syndrome
Source: PubMed Central journal article supplement (PMC7463691; doi:10.3390/jcm9082446), 2020-07-31
Supplement: jcm-09-02446-s001.pdf [file jcm-09-02446-s001.pdf]

Table 1. Lung mechanics per day and PEEP

| <b>Total of 399 Measurements</b> |                           |      |         |          |
|----------------------------------|---------------------------|------|---------|----------|
|                                  | PEEP (cmH <sub>2</sub> O) | ARDS | Obesity | Controll |
| Day 1                            | 15                        | 22   | 18      | 10       |
|                                  | 10                        | 20   | 18      | 10       |
|                                  | 5                         | 17   | 16      | 10       |
| Day 2                            | 15                        | 22   | 18      | 9        |
|                                  | 10                        | 20   | 18      | 9        |
|                                  | 5                         | 18   | 16      | 9        |
| Day 3                            | 15                        | 16   | 16      | 8        |
|                                  | 10                        | 16   | 16      | 8        |
|                                  | 5                         | 15   | 16      | 8        |
